# Supplementary material for: A comparative study on the oxidation state of lattice oxygen among Li1.14Ni0.136Co0.136Mn0.544O2, Li2MnO3, LiNi0.5Co0.2Mn0.3O2 and LiCoO2 for the initial charge–discharge
Source: Royal Society of Chemistry journal article supplement (doi:10.1039/c5ta02161h), 2015-01-01
Supplement: c5ta02161h1.pdf [file c5ta02161h1.pdf]

## Supplementary Information

### **A Comparative Study on the Oxidation State of Lattice Oxygen among $\text{Li}_{1.14}\text{Ni}_{0.136}\text{Co}_{0.136}\text{Mn}_{0.544}\text{O}_2$ , $\text{Li}_2\text{MnO}_3$ , $\text{LiNi}_{0.5}\text{Co}_{0.2}\text{Mn}_{0.3}\text{O}_2$ and $\text{LiCoO}_2$ for the Initial Charge-Discharge**

Shaojie Han <sup>a,b</sup>, Yonggao Xia <sup>a,\*</sup>, Zhen Wei<sup>a</sup>, Bao Qiu<sup>a</sup>, Lingchao Pan<sup>a</sup>, Qingwen Gu<sup>a</sup>,

Zhaoping Liu <sup>a,\*</sup>, Zhiyong Guo<sup>b</sup>

<sup>a</sup> *Ningbo Institute of Materials Technology and Engineering, Chinese Academy of  
Sciences, Zhejiang 315201, P. R. China.*

<sup>b</sup> *The School of Material Science and Chemical Engineering, Ningbo University,  
Zhejiang 315211, P. R. China*

---

\* Corresponding authors. Tel./Fax: +86-574-8668-5096.

E-mail addresses: xiayg@nimte.ac.cn (Y. Xia), liuzp@nimte.ac.cn (Z. Liu).

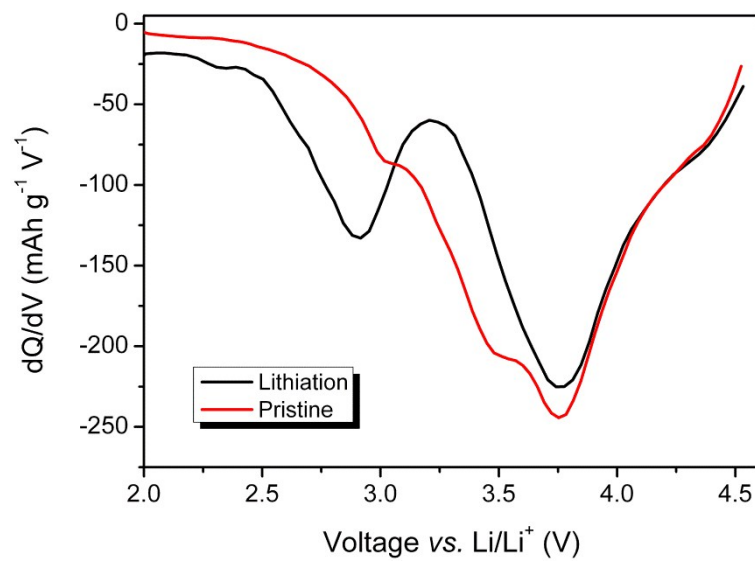

**Fig. S1** Differential discharge capacity ( $dQ/dV$ ) plots of the pristine sample and the sample recovered after chemical lithiation for  $\text{Li}_{1.14}\text{Ni}_{0.136}\text{Co}_{0.136}\text{Mn}_{0.544}\text{O}_2$ .

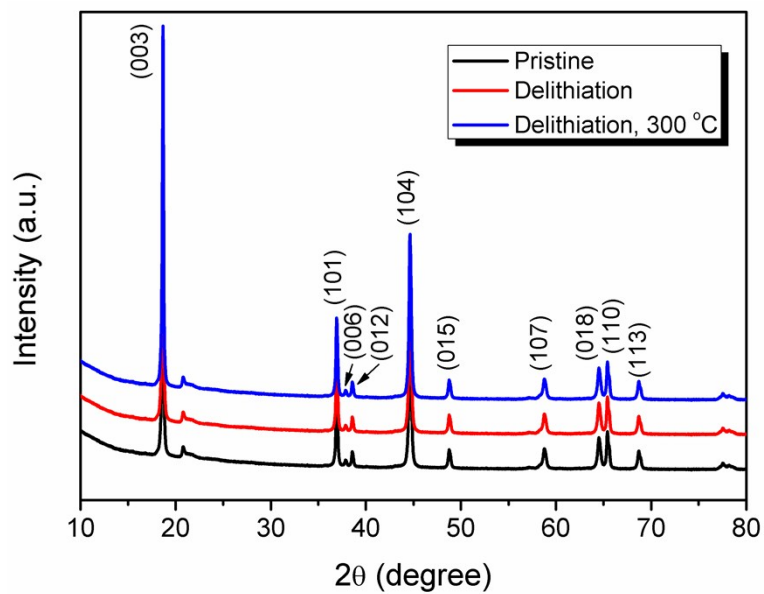

**Fig. S2** XRD patterns for  $\text{Li}_{1.14}\text{Ni}_{0.136}\text{Co}_{0.136}\text{Mn}_{0.544}\text{O}_2$ , from top to bottom, the patterns collected from the pristine sample, the sample recovered after chemical delithiation and the sample recovered after chemical delithiation and annealing at 300 °C. The scan rate used here is  $0.4^\circ \text{ min}^{-1}$ .

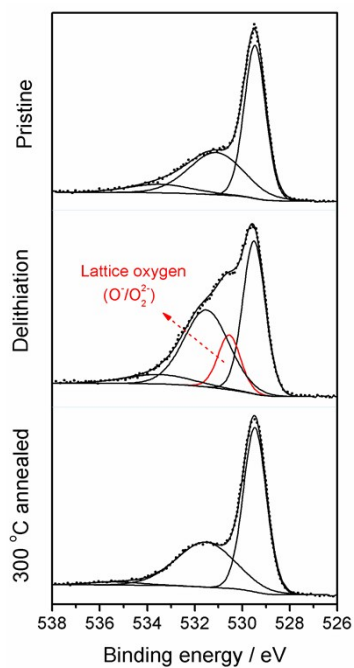

**Fig. S3** XPS spectra for  $\text{Li}_{1.14}\text{Ni}_{0.136}\text{Co}_{0.136}\text{Mn}_{0.544}\text{O}_2$ , from top to bottom, the spectra collected from the pristine sample, the sample recovered after chemical delithiation and the sample recovered after chemical delithiation and annealing at 300 °C.
